# Supplementary material for: Predialysis Hyponatremia and Positive Change of Natremia Within Hemodialysis Sessions Are Strong Indicators of Poor Cardiovascular Outcome in Hemodialysis Patients
Source: PubMed Central journal article supplement — Kidney Int Rep. 2020 Dec 17;6(2):248–51. doi: 10.1016/j.ekir.2020.12.011 (PMC7879207; doi:10.1016/j.ekir.2020.12.011), 2020-12-17
Supplement: mmc1.pdf [file mmc1.pdf]

## Supplemental References

S1. C.M. Rhee, J.C. Ayus and K. Kalantar-Zadeh, Hyponatremia in the dialysis population, *Kidney Int Rep* **4**, 2019, 769–780

S2. C. Overgaard-Steensen, A. Larsson, H. Bluhme, E. Tønnesen, J. Frøkiaer, T. Ring, Edelman's equation is valid in acute hyponatremia in a porcine model: plasma sodium concentration is determined by external balances of water and cations, *Am J Physiol Regul Integr Comp Physiol* **298**, 2010, R120–R129

S3. R. Agarwal, P. Alborzi, S. Satyan and R.P. Light, Dry-weight reduction in hypertensive hemodialysis patients (DRIP): a randomized, controlled trial, *Hypertension* **53**, 2009, 500–507
